# Supplementary material for: Influenza surveillance in pigs: balancing act between broad diagnostic coverage and specific virus characterization
Source: Research Square preprint supplement (doi:10.21203/rs.3.rs-3873860/v1), 2024-01-22
Supplement: Supplementary file 2 [file 549c235dac17d3a4ec00272b.docx]

**Table 4.**

| **Sample type** | **Reference** | **OR with 95%CI** | **p-value** |
| --- | --- | --- | --- |
| NS  CW | DW | 144.03 (26.93; 770.23)  53.77 (10.71; 269.85) | p<0.001  p<0.001 |
| OF | 71.41 (13.27; 384.36) | p<0.001 |
| TBS |  | 13.42 (2.38; 75.58) | p=0.003 |
| NS  CW | USW | 18.73 (3.27; 107.34)  7 (1.22; 40.18) | p=0.001  p=0.029 |
| OF DW TBS | 9.28 (1.42; 60.52) 0.13 (0.02 1.09) 1.74 (0.25; 12.34) | p=0.020 p=0.060 p=0.577 |
| NS  OF  CW | TBS | 10.73 (3.05; 37.70)  5.32 (1.57; 17.97)  4 (1.26; 12.73) | p<0.001  p=0.007  p=0.019 |
| CW OF | NS | 0.05 (0.01; 0.03) 0.49 (0.21;1.20) | p=0.026 p=0.119 |
| OF | CW | 1.33 (0.57;3.10) | p=0.512 |
