# Supplementary material for: Influenza surveillance in pigs: balancing act between broad diagnostic coverage and specific virus characterization
Source: Research Square preprint supplement (doi:10.21203/rs.3.rs-3873860/v1), 2024-01-22
Supplement: Supplementary file 3 [file 9ab260bc22848d0685c0e4f8.docx]

**Table 1.**

| Individual samples | | | | | | Group samples | | | | |
| --- | --- | --- | --- | --- | --- | --- | --- | --- | --- | --- |
| Specimen | **NS** | | **TBS** |  |  | **CW** | **DW** | **USW** | **OF** |  |
| Sows |  |  | |  |  |  |  |  |  |  |
| Farrowing | 10 | - | |  |  | 1* | 1* | - | - |  |
| Breeding | 10 | - | |  |  | 1 | 1 | - | - |  |
| Gestation | 10 | - | |  |  | 1 | 1 | - | - |  |
| → in each production group 4 gilts, 3 sows parity 2nd-4th, 3 sows > 4th parity | | | | | | | | | |  |
