# Supplementary material for: Influenza surveillance in pigs: balancing act between broad diagnostic coverage and specific virus characterization
Source: Research Square preprint supplement (doi:10.21203/rs.3.rs-3873860/v1), 2024-01-22
Supplement: Supplementary file 4 [file 9f5385db5242c5a2108ee99c.docx]

**Table 3.**

|  |  |  | **Sows** | |  | **Suckling piglets** | | |  | **Nursery** | | | |
| --- | --- | --- | --- | --- | --- | --- | --- | --- | --- | --- | --- | --- | --- |
| Material | |  | CW | DW |  | CW | DW | USW |  | CW | DW | OF | TBS |
| NS | | kappa (*p*-value) | 0.298 (<0.001) | 0.377 (<0.001) |  | 0.330 (0.003) | 0.504 (<0.001) | 0.744 (<0.001) |  | 0.647 (<0.001) | 0.391 (<0.001) | 0.360 (<0.001) | 0.434 (<0.001) |
| CW | | kappa (p-value) | - | 0.733 (<0.001) |  | - | 0.827 (<0.001) | 0.487 (<0.001) |  | - | 0.438 (<0.001) | 0.423 (<0.001) | 0.533 (<0.001) |
| DW | | kappa (p-value) | - | - |  | - | - | 0.666 (<0.001) |  | - | - | 0.457 (<0.001) | 0.181 (0.008) |
| OF | | kappa (p-value) | - | - |  | - | - | - |  | - | - | - | 0.128 (0.023) |
