# Supplementary material for: Influenza surveillance in pigs: balancing act between broad diagnostic coverage and specific virus characterization
Source: Research Square preprint supplement (doi:10.21203/rs.3.rs-3873860/v1), 2024-01-22
Supplement: Supplementary file 5 [file a9bb20ddd70f094f50af2ee6.docx]

**Table 5.**

|  | H1avN1 | H1avN2 | H1pdmN1 | H1pdmN2 | H1huN1 | H1huN2 | Total |
| --- | --- | --- | --- | --- | --- | --- | --- |
| NS | 26 | 7 | 5 | 4 | 4 | 1 | 47 |
| CW | 10 | 1 | 0 | 0 | 1 | 0 | 12 |
| DW | 0 | 0 | 0 | 1 | 0 | 0 | 1 |
| USW | 2 | 0 | 1 | 0 | 0 | 0 | 3 |
| OF | 26 | 4 | 0 | 6 | 0 | 0 | 36 |
| TBS | 4 | 0 | 0 | 0 | 0 | 0 | 4 |
| Total | 68 | 12 | 6 | 11 | 5 | 1 | 103 |
