# Supplementary material for: Influenza surveillance in pigs: balancing act between broad diagnostic coverage and specific virus characterization
Source: Research Square preprint supplement (doi:10.21203/rs.3.rs-3873860/v1), 2024-01-22
Supplement: Supplementary file 6 [file d0b050adf66158630f444ae3.docx]

**Table 2**

| **Age group** | **Sample type** | **Reference** | **OR with 95%CI** | **p-value** |
| --- | --- | --- | --- | --- |
| Sows | CW NS | DW | 2.76 (0.85; 8.98) 2.76 (0.85; 8.98) | p=0.091 p=0.091 |
|  | NS | CW | 1.00 (0.29; 3.43) | p=1.000 |
| Suckling piglets | NS | CW | 9.44 (1.86; 48) | p=0.007 |
| USW DW | 5.13 (1.12; 23.53) 2.34 (0.52; 10.51) | p=0.036 p=0.266 |
| DW USW | NS | 0.25 (0.05; 1.15) 0.57 (0.13; 2.51) | p=0.075 p=0.461 |
| DW | USW | 0.43 (0.097; 1.92) | p=0.270 |
| Nursery | DW CW OF | NS | 5.92 (2.67; 13.09) 1.68 (0.78; 3.59) 13.52 (5.70; 32.09) | p<0.001 p=0.181 p<0.001 |
| TBS |  | 0.48 (0.21; 1.07) | p=0.073 |
| CW | TBS | 3.50 (1.56; 7.83) | p=0.002 |
| DW | 12.32 (5.25; 28.13) | p<0.001 |
| OF | 28.17 (11.03; 71.92) | p<0.001 |
| DW | CW | 3.52 (1.65; 7.55) | p=0.001 |
| OF | 8.05 (3.54;18.35) | p<0.001 |
| OF | DW | 2.28 (1.06; 4.91) | p=0.034 |
